# Supplementary figures and images for: Feedback optimizes neural coding and perception of natural stimuli
Source: eLife journal article supplement (doi:10.7554/elife.38935), 2018-10-05

**A**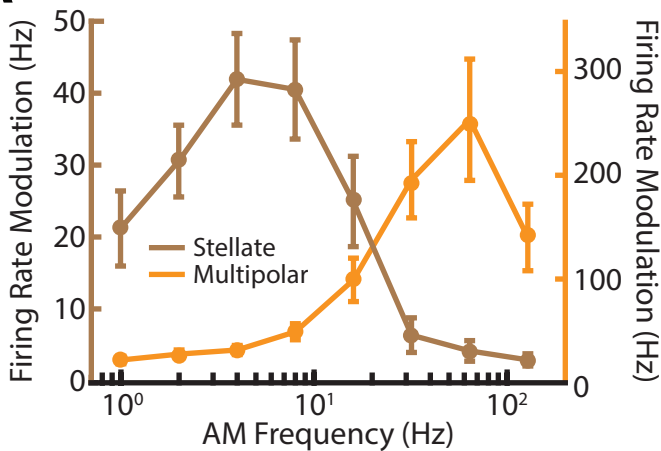**B**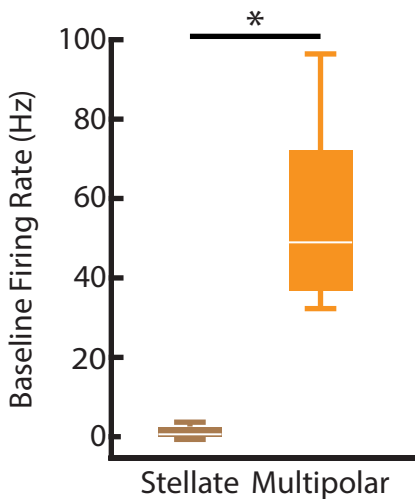

Supplement: supp [file elife-38935-supp-v1.zip]

# Indirect feedback inactivation (CNQX)

A

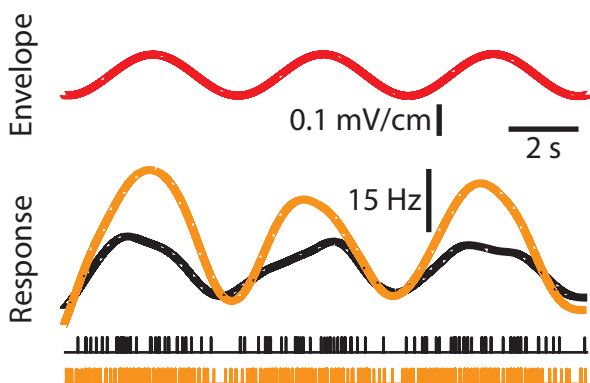

B

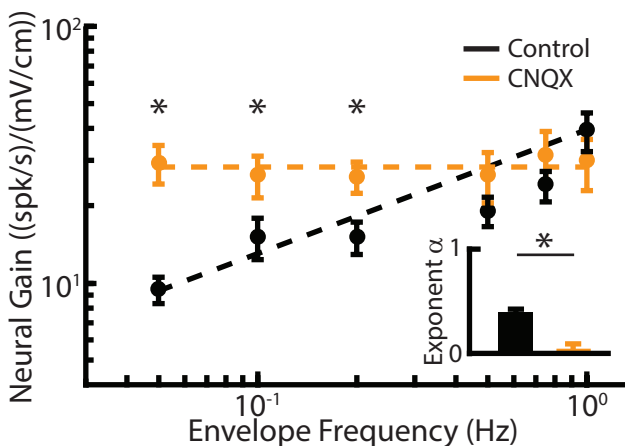

C

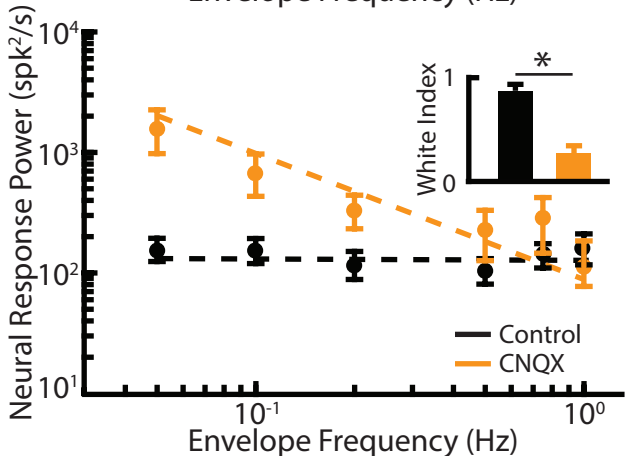

Supplement: supp [file elife-38935-supp-v1.zip]

# Sham complete feedback inactivation

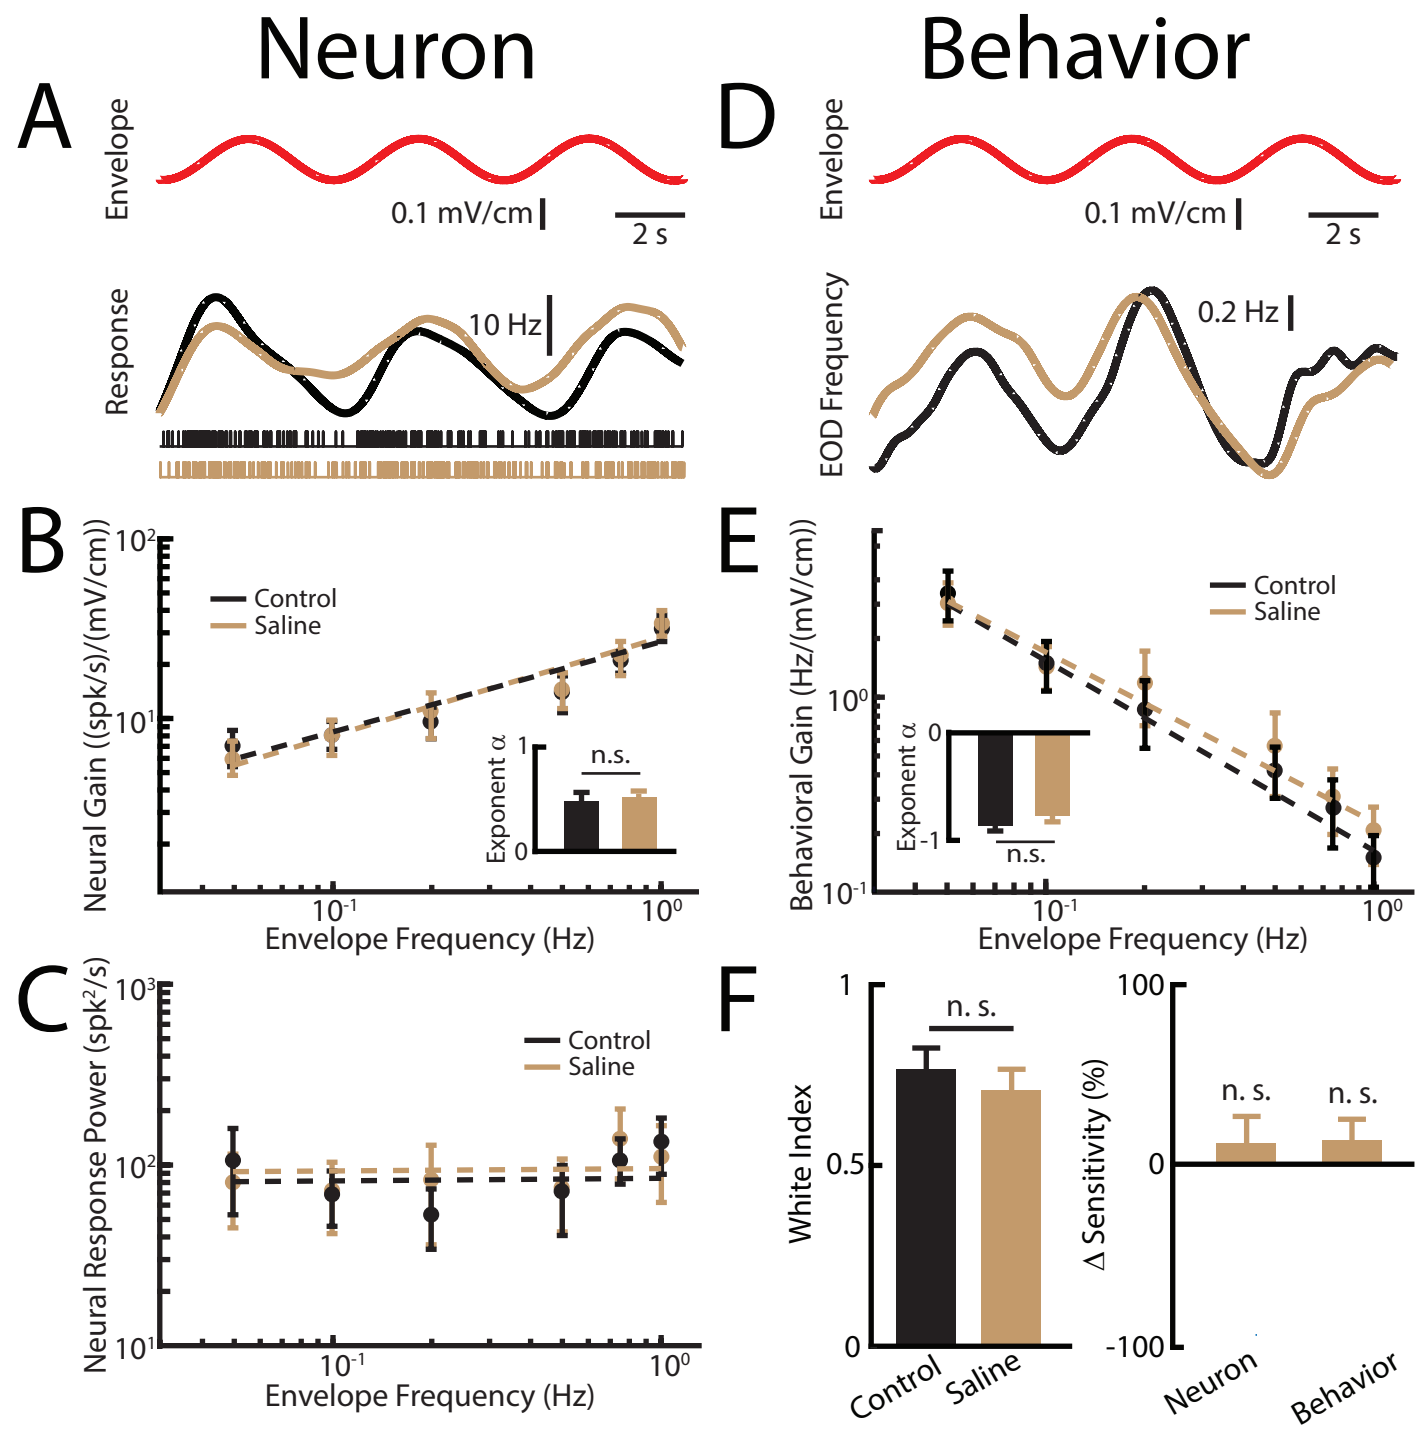

Supplement: supp [file elife-38935-supp-v1.zip]

# Complete feedback inactivation (Lidocaine)

## A

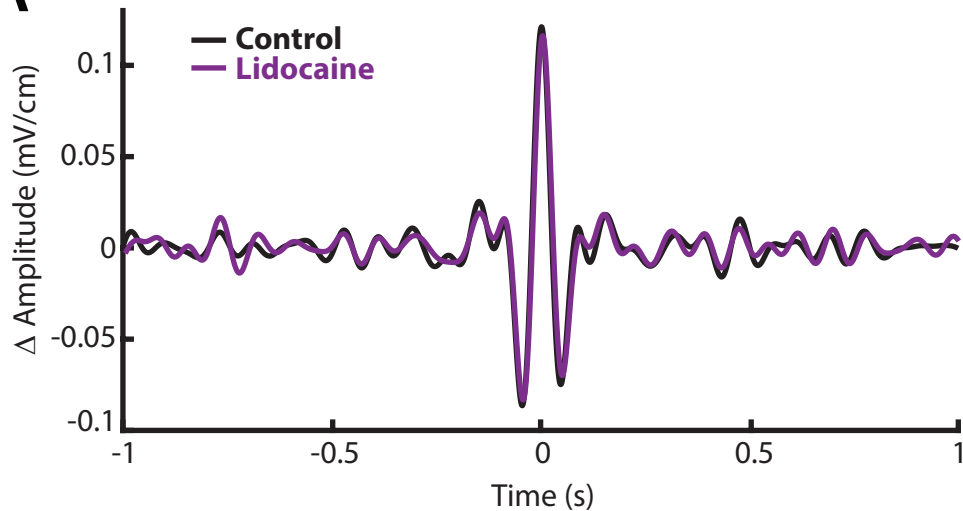

## B

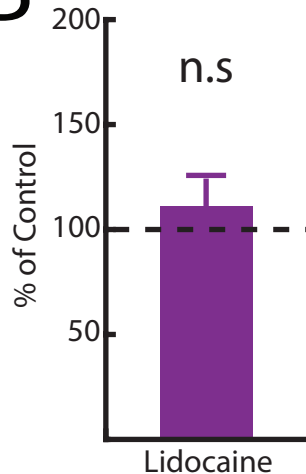

Supplement: supp [file elife-38935-supp-v1.zip]

# Contralateral feedback inactivation

## A

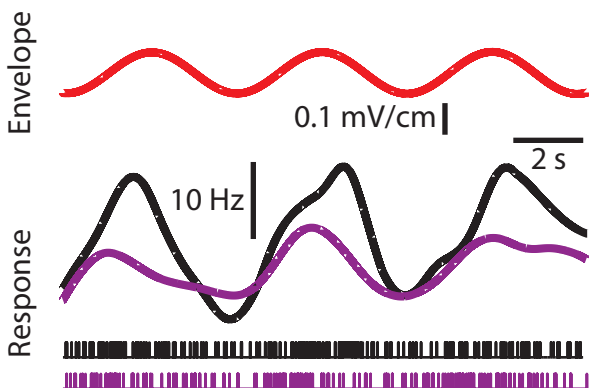

## B

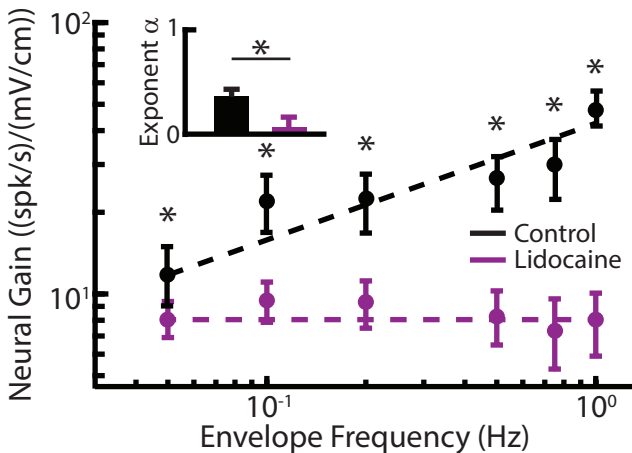

## C

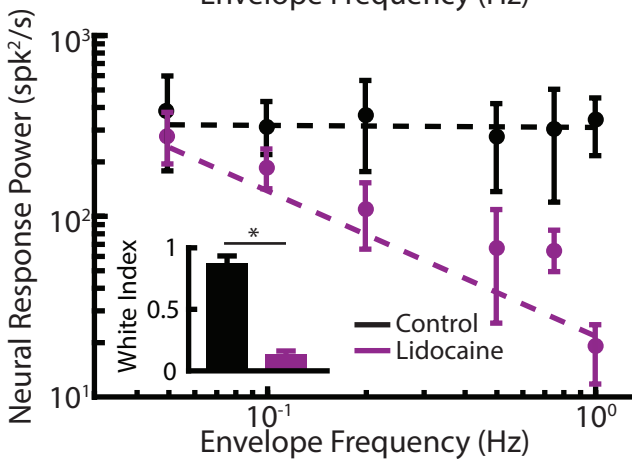

Supplement: supp [file elife-38935-supp-v1.zip]

# Indirect feedback inactivation (CNQX)

## A

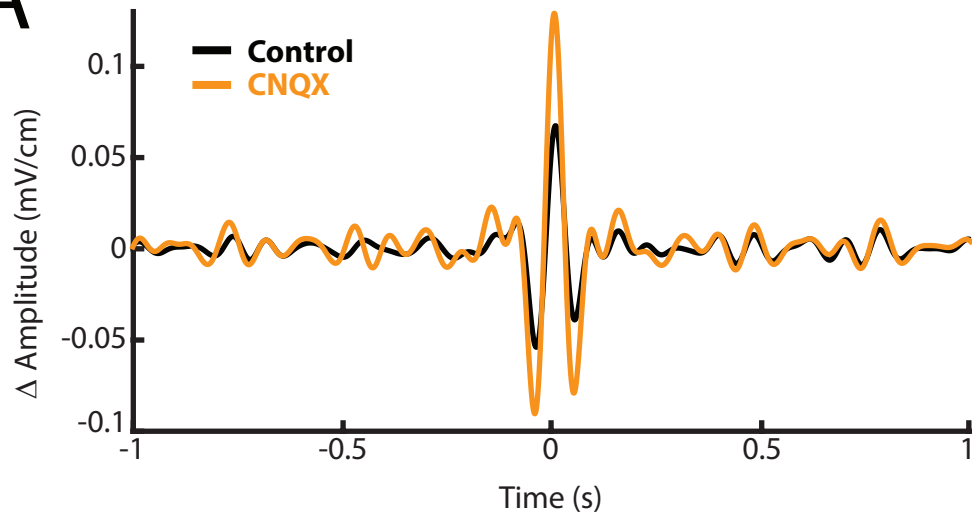

## B

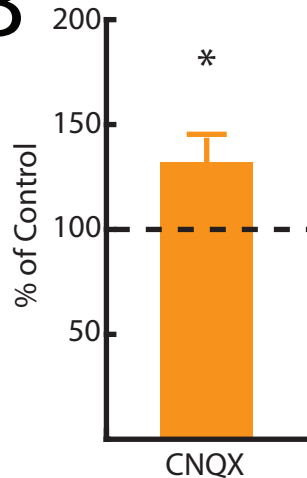

Supplement: supp [file elife-38935-supp-v1.zip]

# Indirect feedback inactivation (Lidocaine)

## A

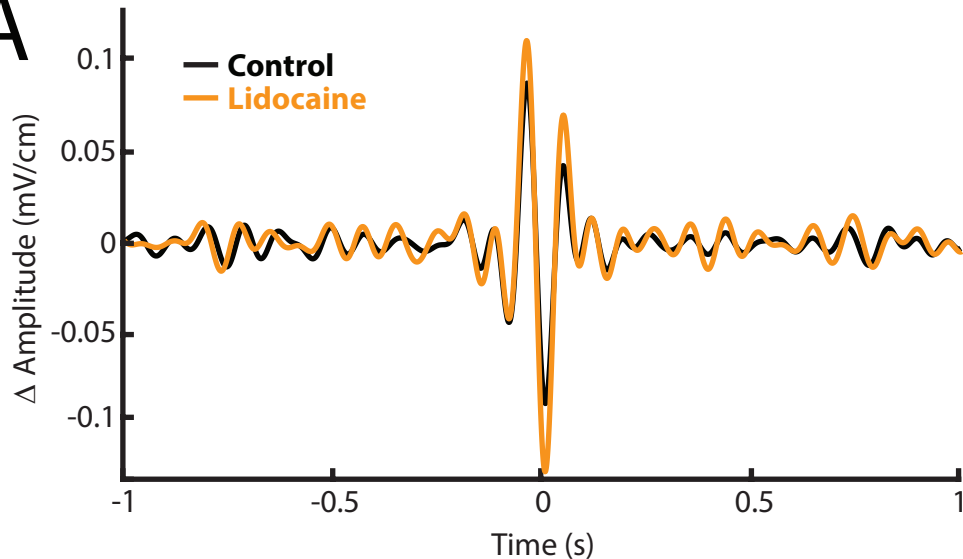

## B

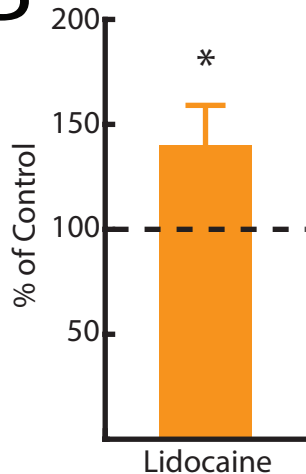

Supplement: supp [file elife-38935-supp-v1.zip]
